# Supplementary material for: In situ SeO2promoted synthesis of CdSe/PPy and Se/PPy nanocomposites and their utility in optical sensing for detection of Hg2+ions
Source: Royal Society of Chemistry journal article supplement (doi:10.1039/c5ra14425f), 2015-01-01
Supplement: c5ra14425f1.pdf [file c5ra14425f1.pdf]

## *In-Situ* SeO<sub>2</sub> Promoted Synthesis of CdSe/PPy and Se/PPy Nanocomposites and their Utility in Optical Sensing for Detection of Hg<sup>2+</sup> Ions

Pawan K. Khanna<sup>a\*</sup>, Sreenu Bhanoth<sup>a</sup>, Vaishali Dhanwe<sup>a</sup>, Anuraj Kshirsagar<sup>a</sup> and Priyesh More<sup>a</sup>

Nanochemistry Lab,  
Department of Applied Chemistry,  
Defence Institute of Advanced Technology (DIAT),  
Ministry of Defence, Govt. of India, Girinagar, Pune-411025, India.  
\*Corresponding author: pawankhanna2002@yahoo.co.in

### Supporting Information

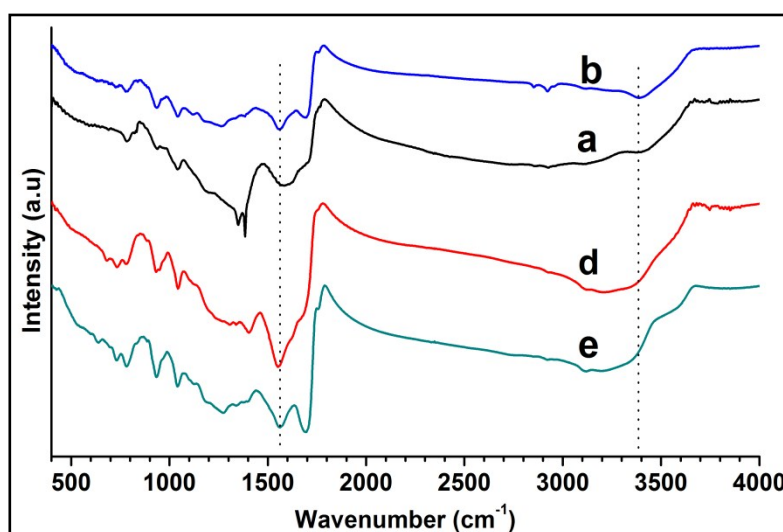

**Fig.S1** FTIR of CdSe/PPy & Se/PPy synthesized by chemical (a, b) & microwave (d, e) methods

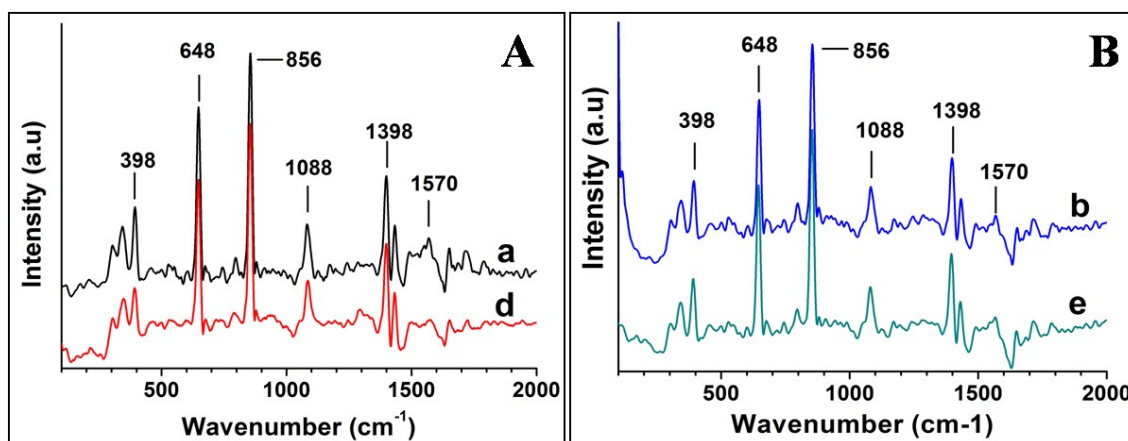

**Fig. S2** Raman spectra of A) CdSe/PPy and B) Se/PPy synthesized by chemical (a, b) & microwave (d, e) methods

**Table S1** FTIR and Raman values of CdSe/PPy and Se/PPy

| Peak assignments              | FTIR ( $\text{cm}^{-1}$ ) |          |        |             |           | Raman shifts ( $\text{cm}^{-1}$ ) |                    |
|-------------------------------|---------------------------|----------|--------|-------------|-----------|-----------------------------------|--------------------|
|                               | PPy <sup>46,47</sup>      | CdSe/PPy | Se/PPy | CdSe/PPy MW | Se/PPy MW | PPy <sup>48,49</sup>              | Se/PPy & CdSe/PPy* |
| N-H                           | 3400                      | 3373     | 3346   | 3328        | 3335      | 1146                              | 1174               |
| C-H stretching                | 3100                      | 3058     | 3049   | 3060        | 3049      | 1083                              | 1088               |
| C=O stretching                | 1667                      | 1702     | 1692   | 1681        | 1692      | -                                 | -                  |
| C=C                           | 1562                      | 1522     | 1527   | 1532        | 1527      | 1581                              | 1570               |
| PPy ring                      | 1390                      | 1382     | 1327   | 1345        | 1348      | 646 and 1370                      | 648 and 1398       |
| C-N                           | 1297                      | 1202     | 1270   | 1301        | 1269      | -                                 | -                  |
| C-H deformation               | 1045                      | 1157     | 1210   | 1192        | 1212      | 868                               | 856                |
| C-N <sup>+</sup> -C bipolaron | 937                       | 935      | 936    | 939         | 940       | -                                 | -                  |

\*CdSe/PPy and Se/PPy synthesized by both methods shows same spectra with overlapping of peaks.

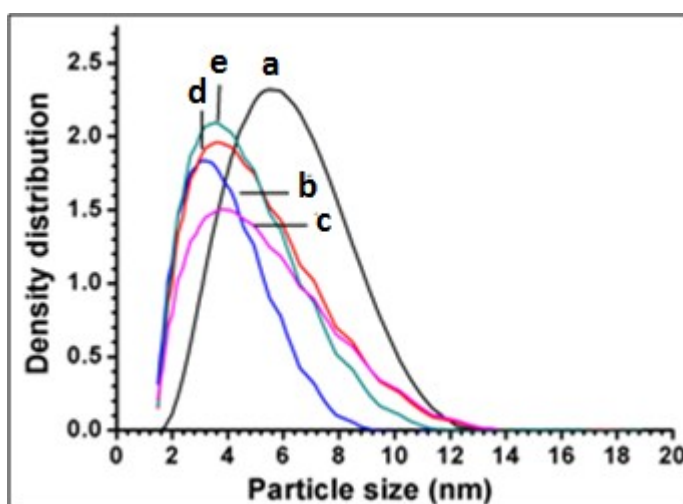

**Fig. S3** Particle size of CdSe/PPy and Se/PPy synthesized by (a, b) chemical method, (c, d) microwave method and (e) CdSe/PPy synthesised by using Se/PPy as precursor.
